# Supplementary material
Source: PubMed Central journal article supplement (PMC5173458)
Supplement: supp_4.4.E754_2016-0046-1-at.pdf [file supp_4.4.E754_2016-0046-1-at.pdf]

**APPENDIX 1 (as supplied by the authors): Supplementary tables**

| <b>Supplementary Table 1: Studies used to abstract relative risks of oral contraceptives and hormone therapy use for associated cancer sites</b> |                        |              |                        |                                  |                                                                       |                                                                                                                                               |
|--------------------------------------------------------------------------------------------------------------------------------------------------|------------------------|--------------|------------------------|----------------------------------|-----------------------------------------------------------------------|-----------------------------------------------------------------------------------------------------------------------------------------------|
| First Author/Year                                                                                                                                | Risk factor            | Cancer sites | Analysis               | Search time frame                | Number of Studies included (Quality) <sup>a</sup>                     | Study design and population size                                                                                                              |
| Gierisch et al. 2013 (1)                                                                                                                         | Oral contraceptive use | Breast       | Meta-analysis          | January 1, 1990 to June 29, 2012 | Twenty three studies (12 good, 9 fair, 2 poor quality)                | Fifteen case-control studies: 38,682 women; Eight cohort studies: 317,341 women across 5 studies and 3,981,072 person-years across 3 studies. |
| Gierisch et al. 2013                                                                                                                             | Oral contraceptive use | Endometrium  | Meta-analysis          | January 1, 1990 to June 29, 2012 | Nine studies (4 good, 2 fair, 1 poor quality)                         | Three case-control studies and 4 cohort studies: 308,198 women across 4 studies and 3,981,072 person-years across other 3 studies.            |
| Havrilesky et al. 2013 (2)                                                                                                                       | Oral contraceptive use | Ovary        | Meta-analysis          | January 1990 to June 2012        | Seventeen studies (11 good, 6 fair, 1 poor quality)                   | Seventeen case-control studies: 10,031 cases and 21,025 controls                                                                              |
| Shah et al. 2005 (3)                                                                                                                             | Hormone therapy        | Breast       | Meta-analysis          | Up to September 2003             | Eight studies (8 good quality)                                        | Four case-control studies and 4 cohort studies: 655,559 women                                                                                 |
| Beral, 2003 (4)                                                                                                                                  | Hormone therapy        | Breast       | Relative Risk Estimate | NA                               | One study: the Million Women Study (Quality assessment not available) | One cohort study: 3202 cases among 285,987 participants                                                                                       |
| Brinton et al. 2014 (5)                                                                                                                          | Hormone therapy        | Endometrium  | Meta-analysis          | NA                               | Fourteen studies (Quality assessment not available)                   | Nine case-control studies and 5 cohort studies: population size not available.                                                                |
| Beral et al. 2005 (6)                                                                                                                            | Hormone therapy        | Endometrium  | Relative Risk Estimate | NA                               | One study: the Million Women Study (Quality                           | One cohort study: 64 cases among 58,300                                                                                                       |

Appendix to: Grevers X, Grundy A, Poirier AE, et al. Cancer incidence attributable to the use of oral contraceptives and hormone replacement therapy in Alberta in 2012. *CMAJ Open* 2016.

DOI:10.9778/cmajo.20160046. Copyright © 2016 Joule Inc. or its licensors

|                                                                                                    |                 |       |               |                      |                                                      |                                                       |
|----------------------------------------------------------------------------------------------------|-----------------|-------|---------------|----------------------|------------------------------------------------------|-------------------------------------------------------|
|                                                                                                    |                 |       |               |                      | assessment not available)                            | participants                                          |
| Beral et al. 2015 (7)                                                                              | Hormone therapy | Ovary | Meta-analysis | 1998 to January 2013 | Seventeen studies (Quality assessment not available) | Seventeen cohort studies: 6,601 cases                 |
| Beral et al. 2015 (7)                                                                              | Hormone therapy | Ovary | Meta-analysis | 1998 to January 2013 | Twelve studies (Quality assessment not available)    | Twelve cohort studies: population size not available. |
| <sup>a</sup> only for studies included in the meta-analysis examining the association of interest. |                 |       |               |                      |                                                      |                                                       |

**Supplementary Table 2:** Observed cancer cases in Alberta (2012) and population attributable risks associated to oral contraceptive and hormone therapy use

| Age at Exposure | Age at Outcome | Cancer Site | Observed Cases | PAR <sup>a</sup> (%) (95% CI) |                               |                            |
|-----------------|----------------|-------------|----------------|-------------------------------|-------------------------------|----------------------------|
|                 |                |             |                | Oral Contraceptive - Ever Use | Hormone Therapy - Current Use | Hormone Therapy - Ever Use |
| 35-44           | 43-52          | Breast      | 463            | 7.0 (0.3,13.3)                |                               |                            |
|                 |                | Endometrium | 57             | -64.8 (-111.5,-27.9)          |                               |                            |
|                 |                | Ovary       | 36             | -33.2 (-46.0,-21.4)           |                               |                            |
| 45-54           | 53-62          | Breast      | 584            | 6.9 (0.2,13.1)                | 9.3 (8.2,10.5)                | 9.0 (3.0,15.6)             |
|                 |                | Endometrium | 183            | -63.4 (-108.2,-26.9)          | -4.0 (-7.0,-0.4)              | -5.9 (-7.8,-3.9)           |
|                 |                | Ovary       | 46             | -32.6 (-45.2,-21.5)           | 6.0 (4.8,7.3)                 | 4.8 (3.6,6.1)              |
| 55-64           | 63-72          | Breast      | 559            | 6.5 (0.2,12.4)                | 15.2 (13.5,17.0)              | 19.0 (6.9,30.2)            |
|                 |                | Endometrium | 152            | -57.3 (-95.1,-24.6)           | -7.3 (-13.0,-0.7)             | -15.3 (-20.9,-9.7)         |
|                 |                | Ovary       | 46             | -30.0 (-41.1,-19.4)           | 10.0 (8.1,12.2)               | 10.8 (8.1,13.4)            |
| ≥ 65            | ≥ 73           | Breast      | 522            | 5.2 (0.3,10.1)                | 11.4 (9.8,13.1)               | 19.1 (6.5,30.2)            |
|                 |                | Endometrium | 90             | -40.4 (-62.8,-18.7)           | -5.1 (-9.0,-0.6)              | -15.3 (-21.0,-9.8)         |
|                 |                | Ovary       | 51             | -22.3 (-30.0,-14.9)           | 7.4 (5.7,9.1)                 | 10.8 (8.1,13.4)            |

<sup>a</sup> PAR, population attributable risk (%). It represents the proportion (%) of cancer cases attributable to oral contraceptive ever use or hormone therapy ever use or hormone therapy current use. The negative values represent preventable proportions of cancer cases due to protective effect.

## References

- Gierisch JM, Coeytaux RR, Urrutia RP, Havrilesky LJ, Moorman PG, Lowery WJ, et al. Oral contraceptive use and risk of breast, cervical, colorectal, and endometrial cancers: a systematic review. *Cancer epidemiology, biomarkers & prevention : a publication of the American Association for Cancer Research, cosponsored by the American Society of Preventive Oncology.* 2013;22(11):1931-43.
- Havrilesky LJ, Moorman PG, Lowery WJ, Gierisch JM, Coeytaux RR, Urrutia RP, et al. Oral contraceptive pills as primary prevention for ovarian cancer: a systematic review and meta-analysis. *Obstetrics and gynecology.* 2013;122(1):139-47.

Appendix to: Grevers X, Grundy A, Poirier AE, et al. Cancer incidence attributable to the use of oral contraceptives and hormone replacement therapy in Alberta in 2012. *CMAJ Open* 2016.

DOI:10.9778/cmajo.20160046. Copyright © 2016 Joule Inc. or its licensors

3. Shah NR, Borenstein J, Dubois RW. Postmenopausal hormone therapy and breast cancer: a systematic review and meta-analysis. *Menopause (New York, NY)*. 2005;12(6):668-78.
4. Beral V. Breast cancer and hormone-replacement therapy in the Million Women Study. *Lancet*. 2003;362(9382):419-27.
5. Brinton LA, Felix AS. Menopausal hormone therapy and risk of endometrial cancer. *The Journal of steroid biochemistry and molecular biology*. 2014;142:83-9.
6. Beral V, Bull D, Reeves G. Endometrial cancer and hormone-replacement therapy in the Million Women Study. *Lancet*. 2005;365(9470):1543-51.
7. Beral V, Gaitskell K, Hermon C, et al.; Collaborative group on epidemiological studies of ovarian cancer. Menopausal hormone use and ovarian cancer risk: individual participant meta-analysis of 52 epidemiological studies. *Lancet* 2015;385:1835-42.
